# Supplementary material
Source: PubMed Central journal article supplement (PMC3173982)

A

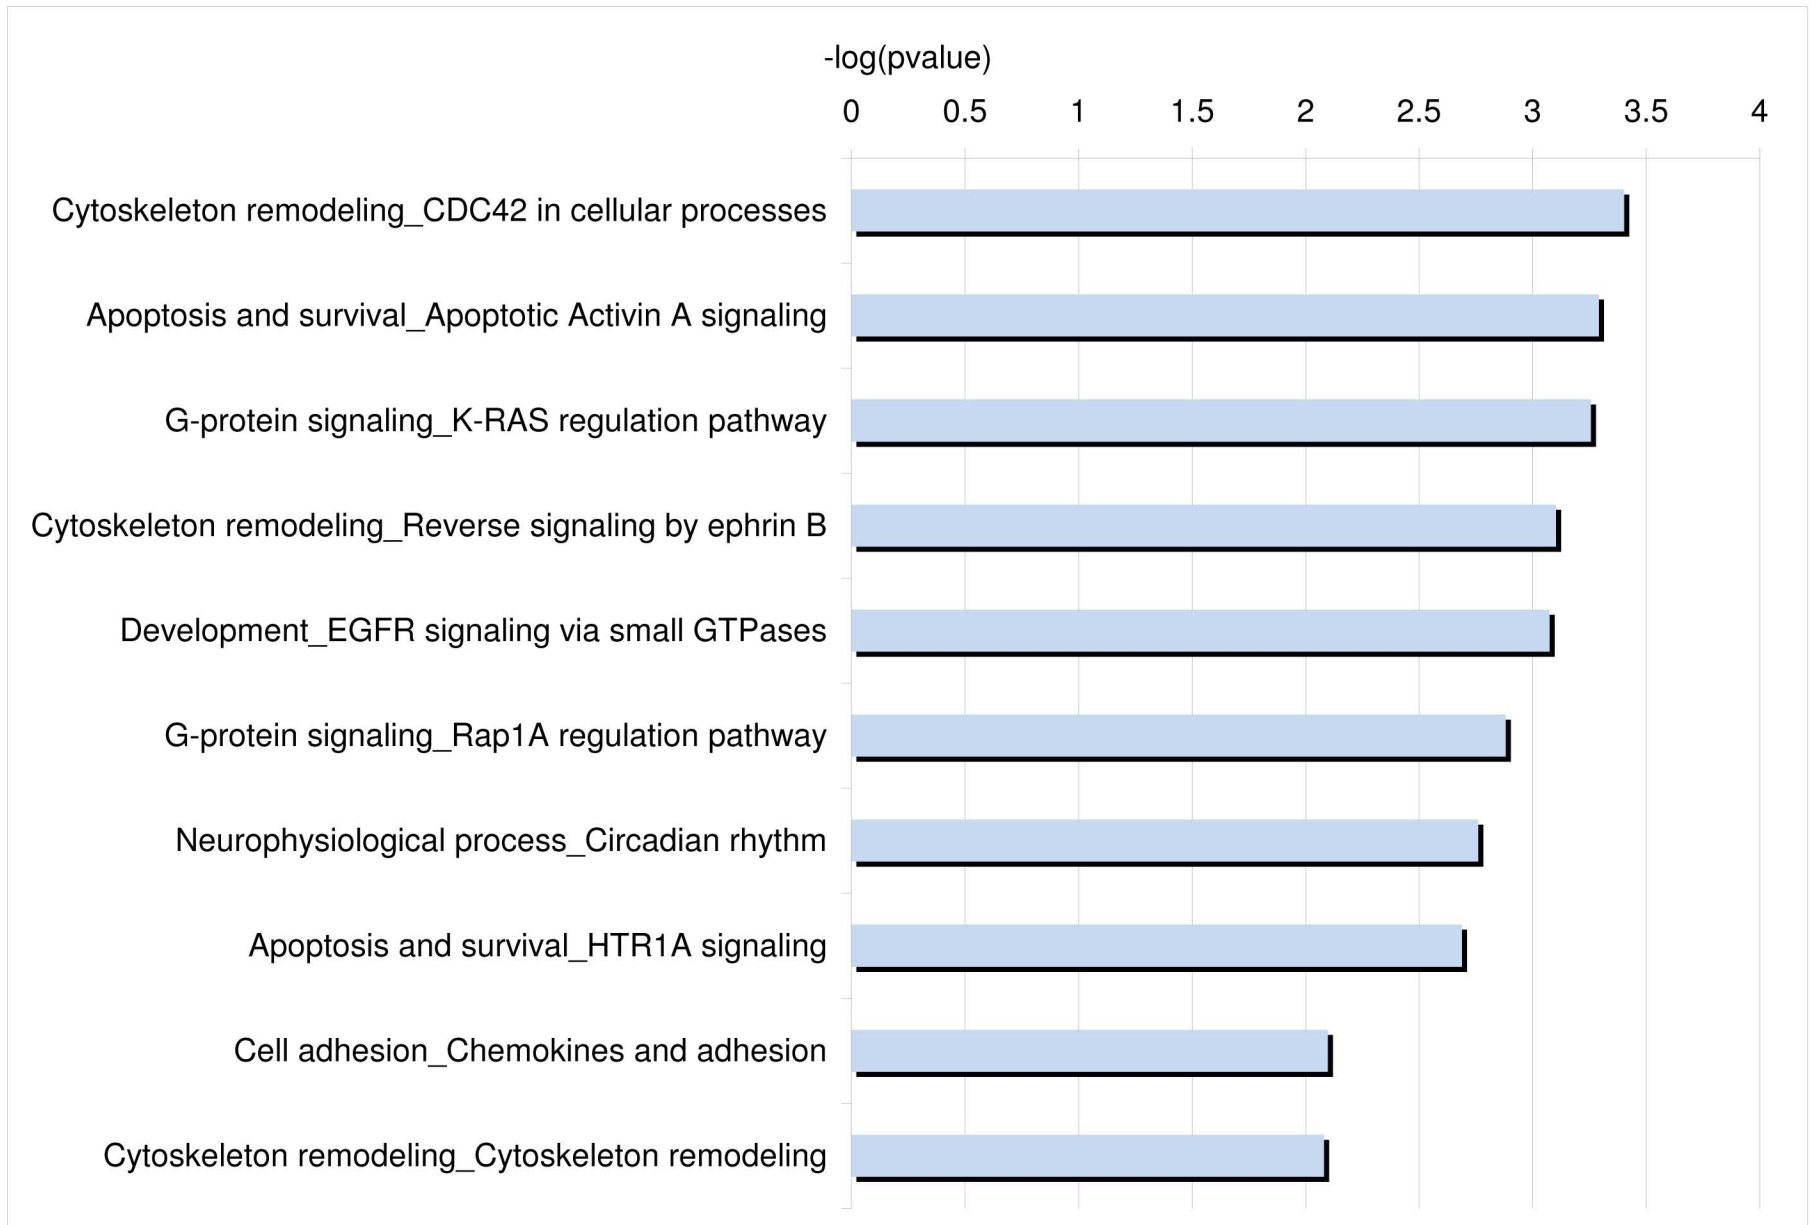

Supplement: NIHMS322361-supplement-Supp_Fig_S1a.pdf [file NIHMS322361-supplement-Supp_Fig_S1a.pdf]

B

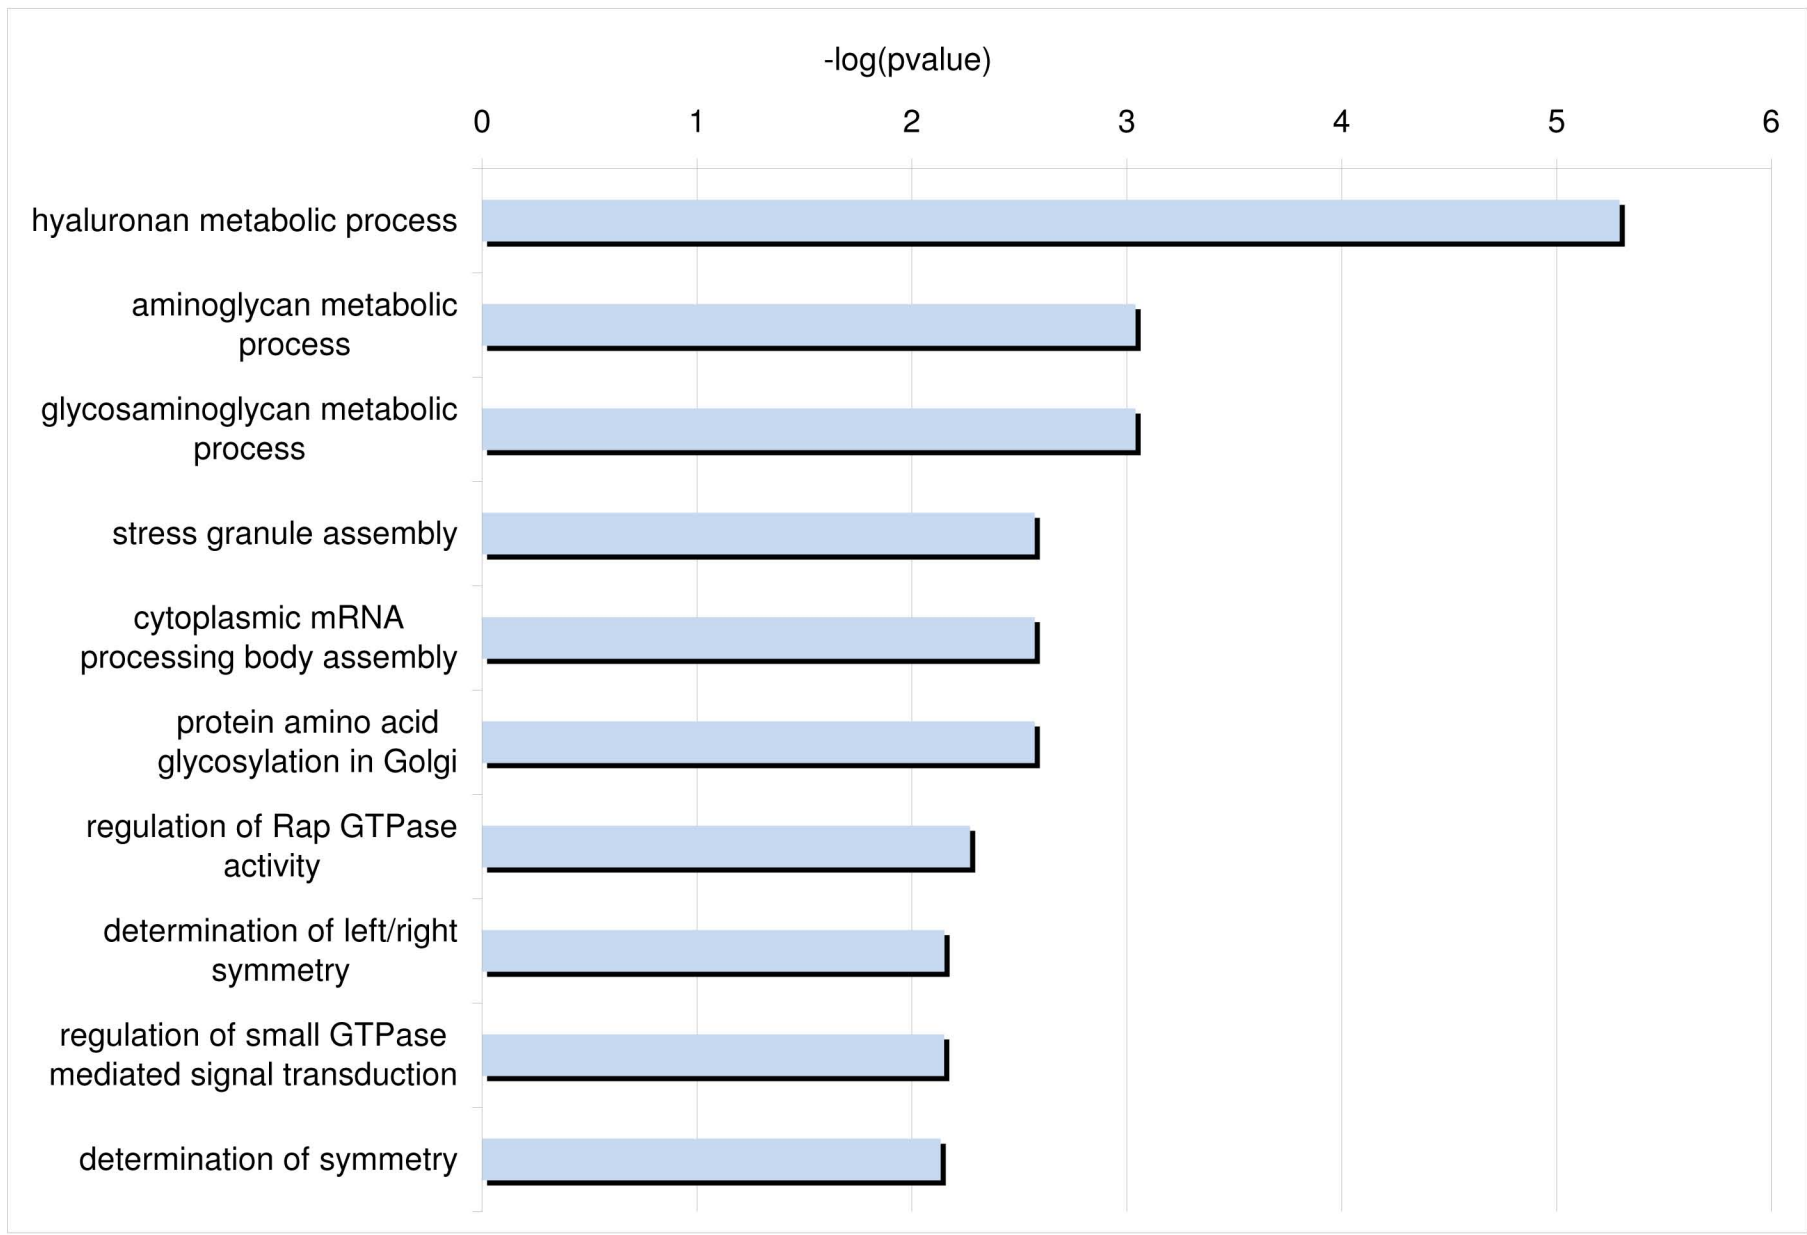

Supplement: NIHMS322361-supplement-Supp_Fig_S1b.pdf [file NIHMS322361-supplement-Supp_Fig_S1b.pdf]

C

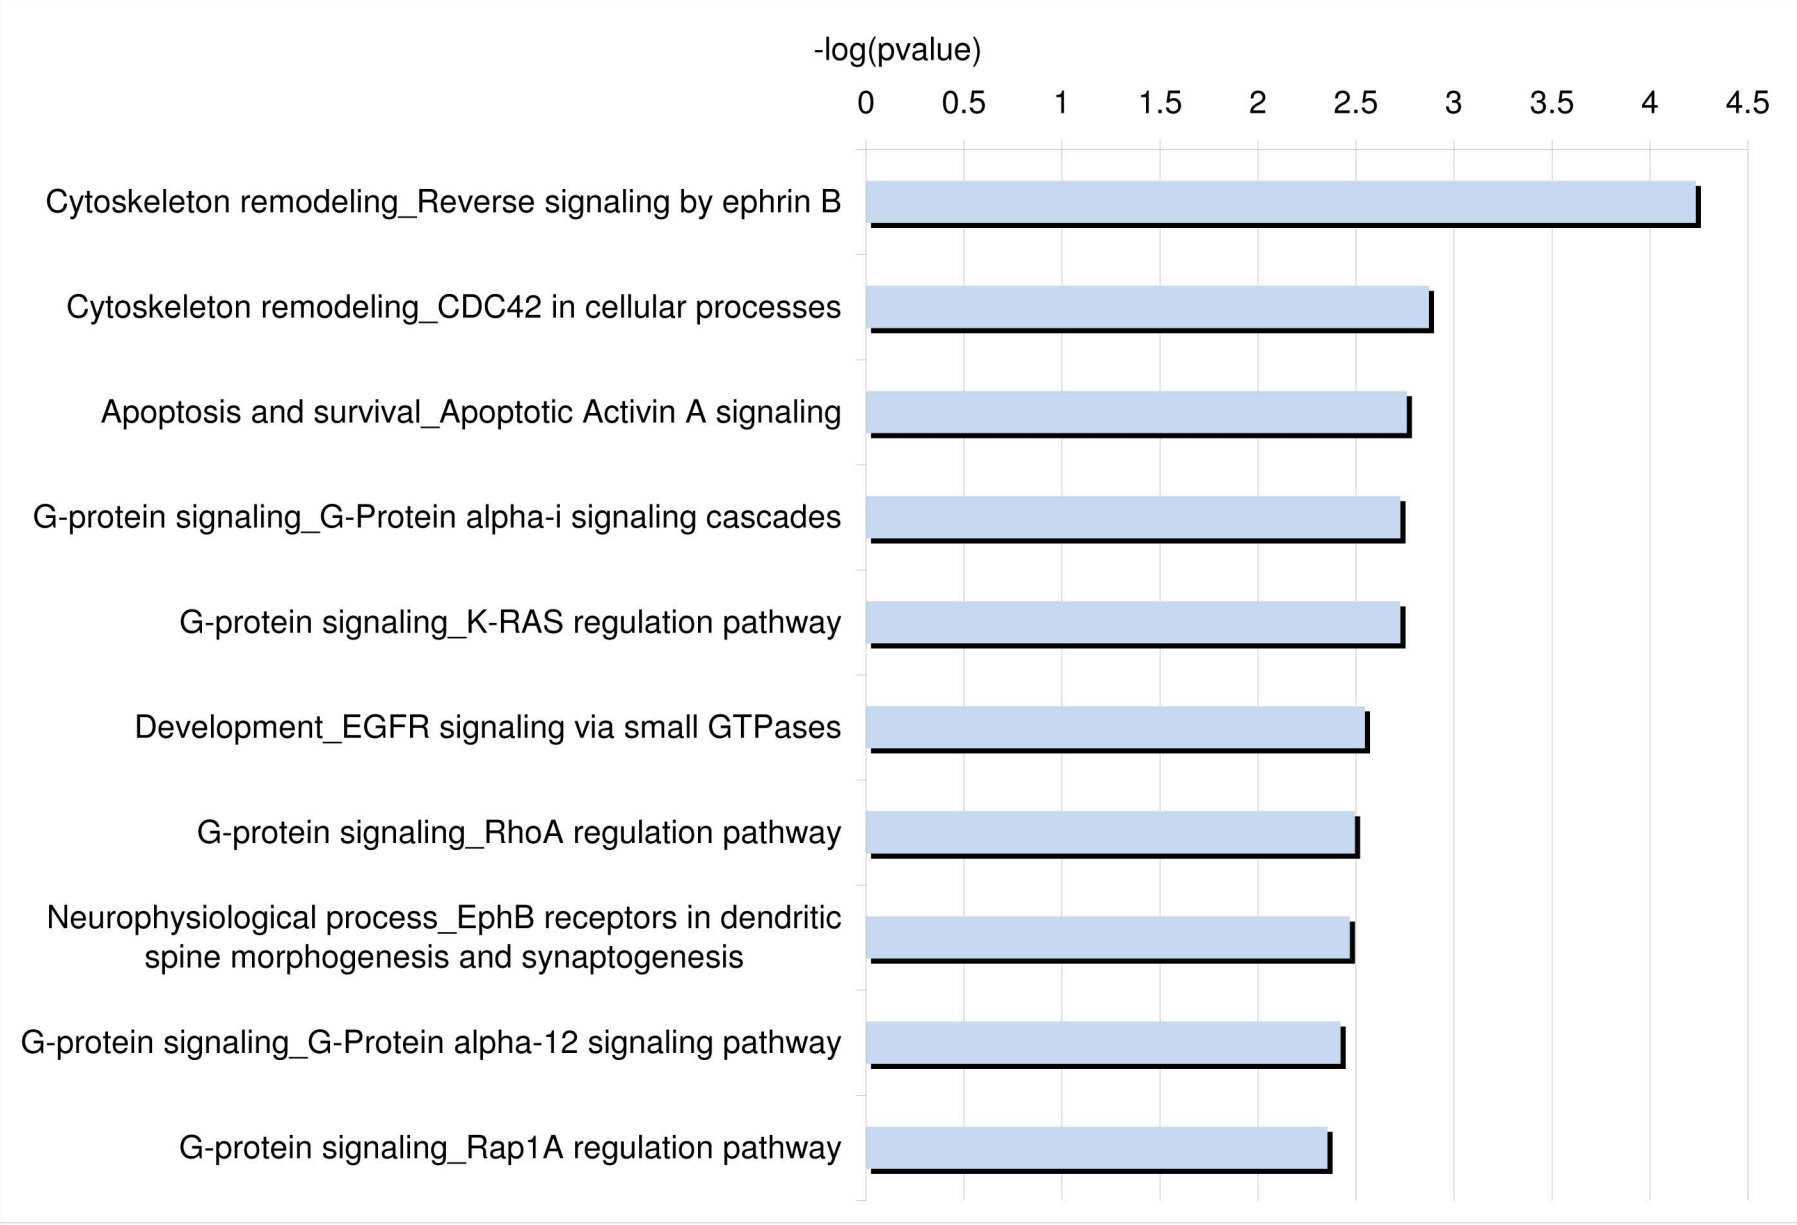

Supplement: NIHMS322361-supplement-Supp_Fig_S1c.pdf [file NIHMS322361-supplement-Supp_Fig_S1c.pdf]

D

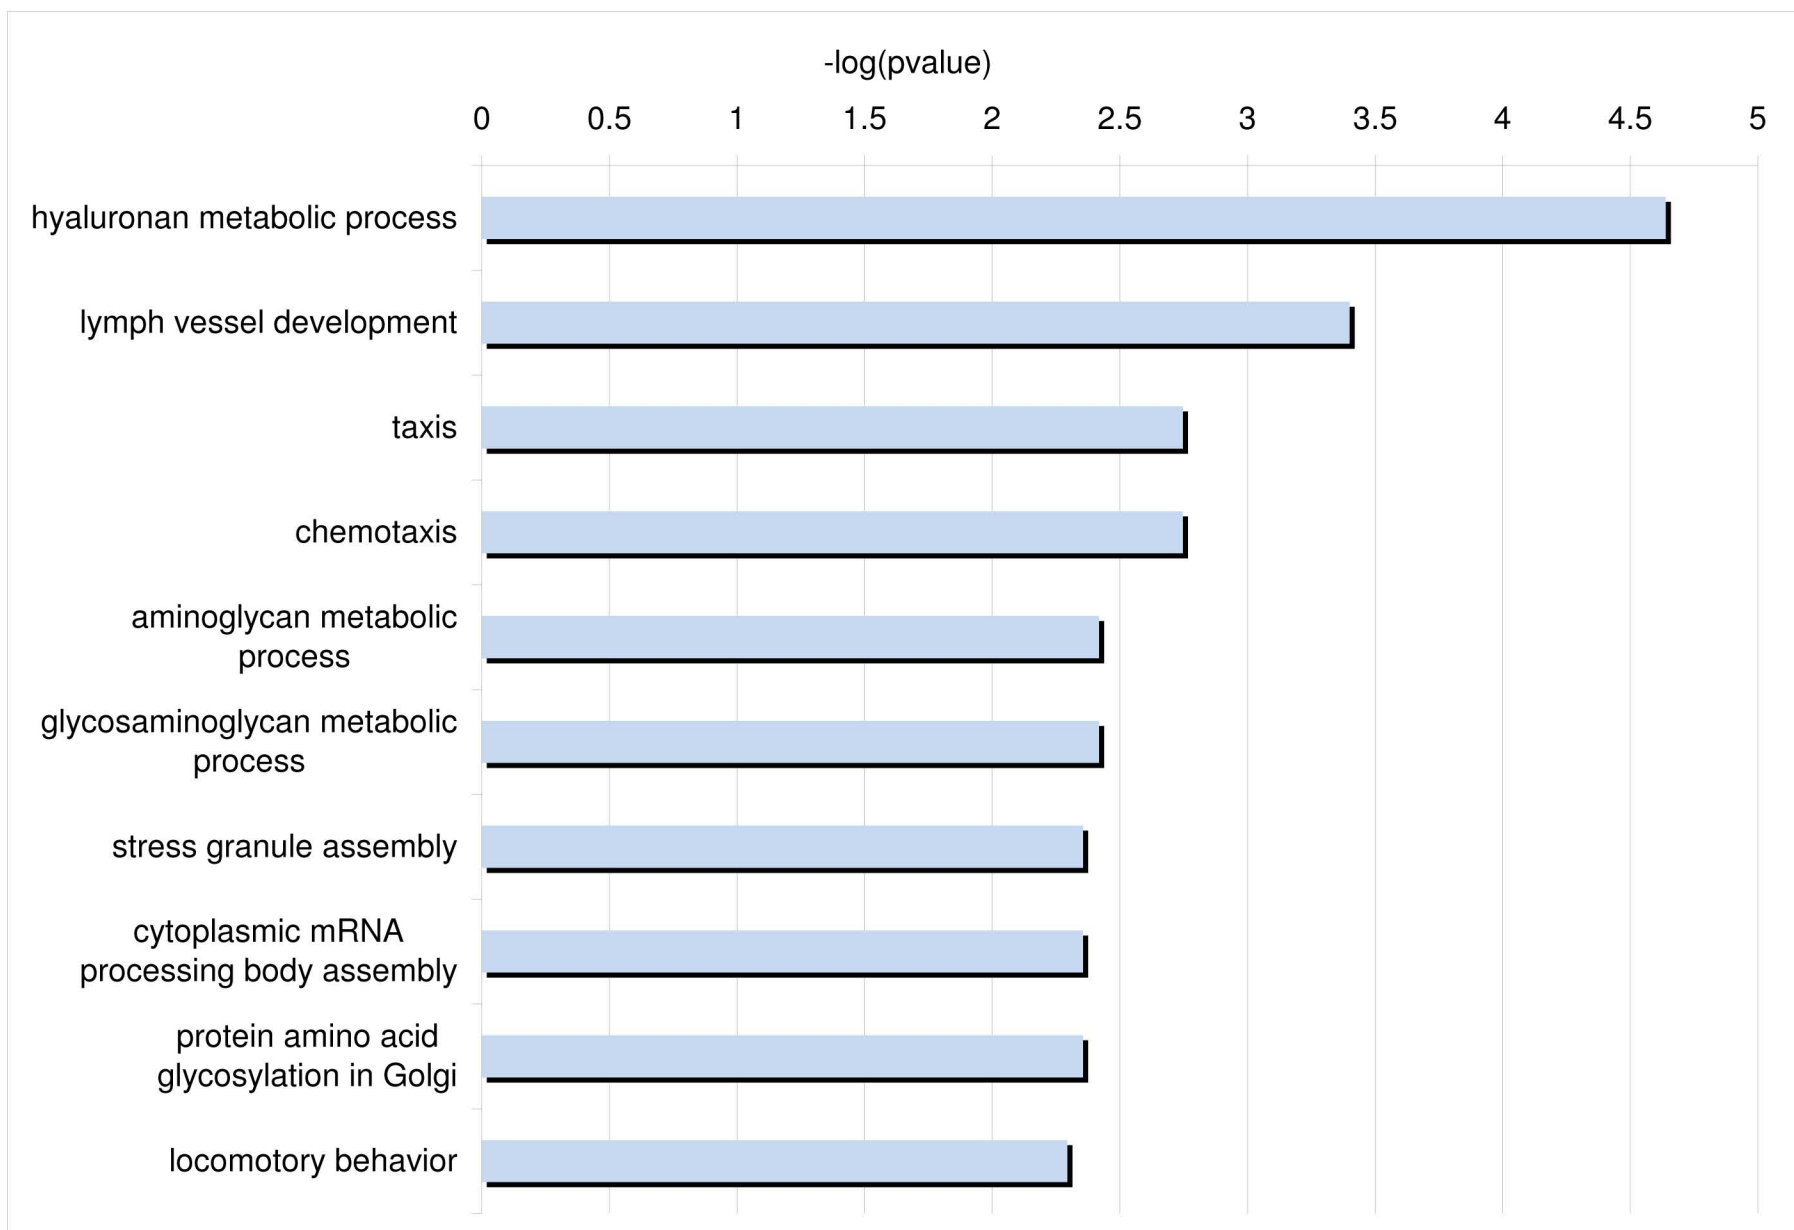

Supplement: NIHMS322361-supplement-Supp_Fig_S1d.pdf [file NIHMS322361-supplement-Supp_Fig_S1d.pdf]
